# Supplementary material for: RNA-seq evaluation of equine alveolar macrophages and monocyte-derived macrophages exposed to an inflammatory stimulus
Source: Research Square preprint supplement (doi:10.21203/rs.3.rs-7122919/v1), 2025-07-23
Supplement: Supplementary file 1 [file 1487bf3d4308443b48051f18.docx]

**Additional file 1**

Title: RNA-seq of equine alveolar macrophages and blood monocyte-derived macrophages exposed to an inflammatory stimulus

Authors: Heng Kang, Gary K.C. Lee, Dorothee Bienzle, Jutta Hammermüller, Luis G. Arroyo, Brandon N. Lillie, Janet Beeler-Marfisi

**Table A1A**. Comparison of FLS§-treated AMs|| and control AMs. The 10 most significant gene-sets enriched in upregulated genes in the FLS-treated group are presented.

| NAME | SIZE | NES* | NOM p-val† | FDR q-val‡ |
| --- | --- | --- | --- | --- |
| KEGG:RHEUMATOID ARTHRITIS | 73 | 2.10 | 0.000 | 0.000 |
| KEGG:IL-17 SIGNALING PATHWAY | 71 | 2.10 | 0.000 | 0.000 |
| REACT:INTERFERON SIGNALING | 134 | 2.09 | 0.000 | 0.000 |
| KEGG:NF-KAPPA B SIGNALING PATHWAY | 88 | 2.07 | 0.000 | 0.000 |
| KEGG:CYTOKINE-CYTOKINE RECEPTOR INTERACTION | 168 | 2.04 | 0.000 | 0.000 |
| KEGG:TNF SIGNALING PATHWAY | 103 | 2.04 | 0.000 | 0.000 |
| REACT:CYTOKINE SIGNALING IN IMMUNE SYSTEM | 512 | 2.03 | 0.000 | 0.000 |
| GO_MF_EF_CYTOKINE_ACTIVITY | 47 | 2.03 | 0.000 | 0.000 |
| REACT:PEPTIDE LIGAND-BINDING RECEPTORS | 61 | 2.02 | 0.000 | 0.000 |
| GO_BP_EF_IMMUNE_RESPONSE | 88 | 2.02 | 0.000 | 0.000 |

**Table A1B**. Comparison of FLS§-treated AMs|| and control AMs. The 10 most significant gene-sets enriched in downregulated genes in the FLS-treated group are presented.

| NAME | SIZE | NES* | NOM p-val† | FDR q-val‡ |
| --- | --- | --- | --- | --- |
| KEGG:OLFACTORY TRANSDUCTION | 26 | -1.95 | 0.000 | 0.050 |
| REACT:INTERCONVERSION OF NUCLEOTIDE DI- AND TRIPHOSPHATES | 24 | -1.85 | 0.001 | 0.215 |
| KEGG:BASE EXCISION REPAIR | 30 | -1.83 | 0.001 | 0.195 |
| KEGG:CARBOHYDRATE DIGESTION AND ABSORPTION | 27 | -1.82 | 0.001 | 0.187 |
| GO_BP_EF_OSTEOBLAST DEVELOPMENT | 10 | -1.77 | 0.001 | 0.313 |
| GO_BP_EF_INDUCTION OF APOPTOSIS BY INTRACELLULAR SIGNALS | 8 | -1.76 | 0.001 | 0.309 |
| REACT:METABOLISM OF FOLATE AND PTERINES | 15 | -1.76 | 0.004 | 0.301 |
| REACT:MISMATCH REPAIR | 13 | -1.75 | 0.005 | 0.311 |
| KEGG:AMINO SUGAR AND NUCLEOTIDE SUGAR METABOLISM | 43 | -1.75 | 0.002 | 0.281 |
| KEGG:MISMATCH REPAIR | 20 | -1.74 | 0.002 | 0.287 |

**Table A2A**. Comparison of FLS§-treated MDMs** and control MDMs. The 10 most significant gene-sets enriched in upregulated genes in the FLS-treated group are presented.

| NAME | SIZE | NES* | NOM p-val† | FDR q-val‡ |
| --- | --- | --- | --- | --- |
| REACT:INTERFERON SIGNALING | 134 | 1.92 | 0.000 | 0.000 |
| KEGG:INFLUENZA A | 135 | 1.92 | 0.000 | 0.000 |
| KEGG:NF-KAPPA B SIGNALING PATHWAY | 88 | 1.9 | 0.000 | 0.000 |
| REACT:INTERFERON ALPHA/BETA SIGNALING | 39 | 1.9 | 0.000 | 0.000 |
| GO_BP_EF_RESPONSE_TO_VIRUS | 38 | 1.88 | 0.000 | 0.000 |
| KEGG:RHEUMATOID ARTHRITIS | 73 | 1.87 | 0.000 | 0.000 |
| KEGG:NOD-LIKE RECEPTOR SIGNALING PATHWAY | 139 | 1.86 | 0.000 | 0.000 |
| REACT:INTERFERON GAMMA SIGNALING | 51 | 1.85 | 0.000 | 0.000 |
| GO_BP_EF_IMMUNE_RESPONSE | 88 | 1.83 | 0.000 | 0.000 |
| KEGG:INTESTINAL IMMUNE NETWORK FOR IGA PRODUCTION | 31 | 1.83 | 0.000 | 0.000 |

**Table A2B**. Comparison of FLS§-treated MDMs** and control MDMs. The 10 most significant gene-sets enriched in downregulated genes in the FLS-treated group are presented.

| NAME | SIZE | NES* | NOM p-val† | FDR q-val‡ |
| --- | --- | --- | --- | --- |
| KEGG:MISMATCH REPAIR | 20 | -1.91 | 0.000 | 0.084 |
| REACT:DISEASES OF DNA REPAIR | 31 | -1.87 | 0.003 | 0.112 |
| KEGG:BASE EXCISION REPAIR | 30 | -1.82 | 0.001 | 0.176 |
| REACT:PCNA-DEPENDENT LONG PATCH BASE EXCISION REPAIR | 20 | -1.81 | 0.002 | 0.151 |
| REACT:RESOLUTION OF ABASIC SITES (AP SITES) | 35 | -1.78 | 0.002 | 0.197 |
| KEGG:NUCLEOTIDE EXCISION REPAIR | 42 | -1.78 | 0.000 | 0.166 |
| GO_BP_EF_MISMATCH_REPAIR | 10 | -1.77 | 0.002 | 0.168 |
| GO_BP_EF_REGULATION OF DNA-DEPENDENT TRANSCRIPTION ELONGATION | 10 | -1.74 | 0.004 | 0.260 |
| GO_MF_EF_MISMATCHED DNA BINDING | 9 | -1.73 | 0.001 | 0.246 |
| GO_BP_EF_POSITIVE REGULATION OF HISTONE ACETYLATION | 9 | -1.73 | 0.001 | 0.235 |

**Table A3A.** Comparison of AMs|| and MDMs** based on the magnitude of gene expression change influenced by FLS§ exposure. The 10 most significant gene-sets enriched in upregulated genes in MDMs are presented.

| NAME | SIZE | NES* | NOM p-val† | FDR q-val‡ |
| --- | --- | --- | --- | --- |
| REACT:INTERFERON ALPHA/BETA SIGNALING | 39 | 2.09 | 0.000 | 0.000 |
| KEGG:INFLUENZA A | 135 | 2.08 | 0.000 | 0.000 |
| REACT:INTERFERON SIGNALING | 134 | 2.05 | 0.000 | 0.000 |
| KEGG:HEPATITIS C | 119 | 2.04 | 0.000 | 0.000 |
| KEGG:MEASLES | 120 | 2.02 | 0.000 | 0.001 |
| REACT:ANTIVIRAL MECHANISM BY IFN-STIMULATED GENES | 73 | 1.96 | 0.000 | 0.005 |
| GO_MF_EF_DOUBLE-STRANDED RNA BINDING | 35 | 1.90 | 0.000 | 0.020 |
| KEGG:EPSTEIN-BARR VIRUS INFECTION | 174 | 1.90 | 0.000 | 0.018 |
| REACT:INTERFERON GAMMA SIGNALING | 51 | 1.89 | 0.001 | 0.024 |
| GO_BP_EF_DEFENSE RESPONSE TO VIRUS | 43 | 1.89 | 0.000 | 0.023 |

**Table A3B.** Comparison of AMs|| and MDMs** based on the magnitude of gene expression change influenced by FLS§ exposure. The 10 most significant gene-sets enriched in downregulated genes in MDMs are presented.

| NAME | SIZE | NES* | NOM p-val† | FDR q-val‡ |
| --- | --- | --- | --- | --- |
| REACT:TRANSCRIPTION OF E2F TARGETS UNDER NEGATIVE CONTROL BY DREAM COMPLEX | 19 | -1.90 | 0.001 | 0.771 |
| KEGG:MINERAL ABSORPTION | 37 | -1.89 | 0.000 | 0.393 |
| REACT:INHIBITION OF REPLICATION INITIATION OF DAMAGED DNA BY RB1/E2F1 | 12 | -1.84 | 0.002 | 0.599 |
| REACT:TRANSCRIPTION OF E2F TARGETS UNDER NEGATIVE CONTROL BY P107 (RBL1) AND P130 (RBL2) IN COMPLEX WITH HDAC1 | 15 | -1.80 | 0.001 | 0.738 |
| REACT:ACTIVATION OF PUMA AND TRANSLOCATION TO MITOCHONDRIA | 8 | -1.79 | 0.002 | 0.648 |
| GO_MF_EF_METALLOCARBOXYPEPTIDASE ACTIVITY | 9 | -1.79 | 0.001 | 0.547 |
| GO_BP_EF_VESICLE DOCKING INVOLVED IN EXOCYTOSIS | 12 | -1.78 | 0.002 | 0.562 |
| GO_CC_EF_INTRINSIC TO ENDOPLASMIC RETICULUM MEMBRANE | 11 | -1.76 | 0.005 | 0.575 |
| REACT:E2F MEDIATED REGULATION OF DNA REPLICATION | 21 | -1.73 | 0.009 | 0.705 |
| GO_MF_EF_CORE PROMOTER BINDING | 13 | -1.72 | 0.006 | 0.719 |

Figure A1. Overview of RNA-seq mapping.


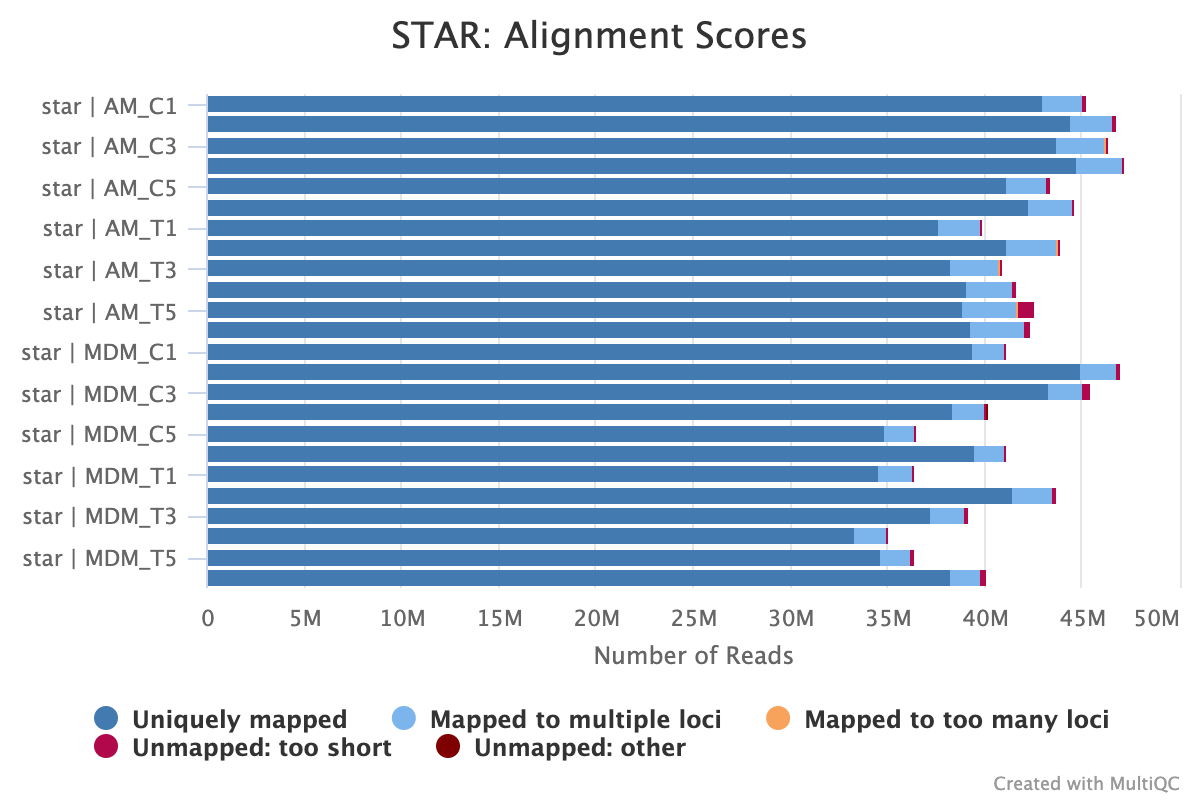


Figure A2. Heatmap of the top 50 differentially expressed genes between control AMs and MDMs, an FDR <0.05 and absolute log2 fold change >1 and a minimum of 3 fragments per kilobase of transcript per million mapped reads.

Figure A3. Multidimensional scaling plot.

Figure A4. Sample clustering plot.

Figure A5. Gene-set enrichment analysis of the differentially expressed genes between control and FLS-stimulated alveolar macrophages. Each node represents a gene-set. FDR: false discovery rate q-value, centre of each node. NES: normalized enrichment score, edge of each node. Connecting lines: genes overlap between sets. Size of the node: number of genes annotated to the gene-set. Threshold for FDR was set at 0.05. Cytokine signaling is the most prominent biological theme upregulated by FLS.


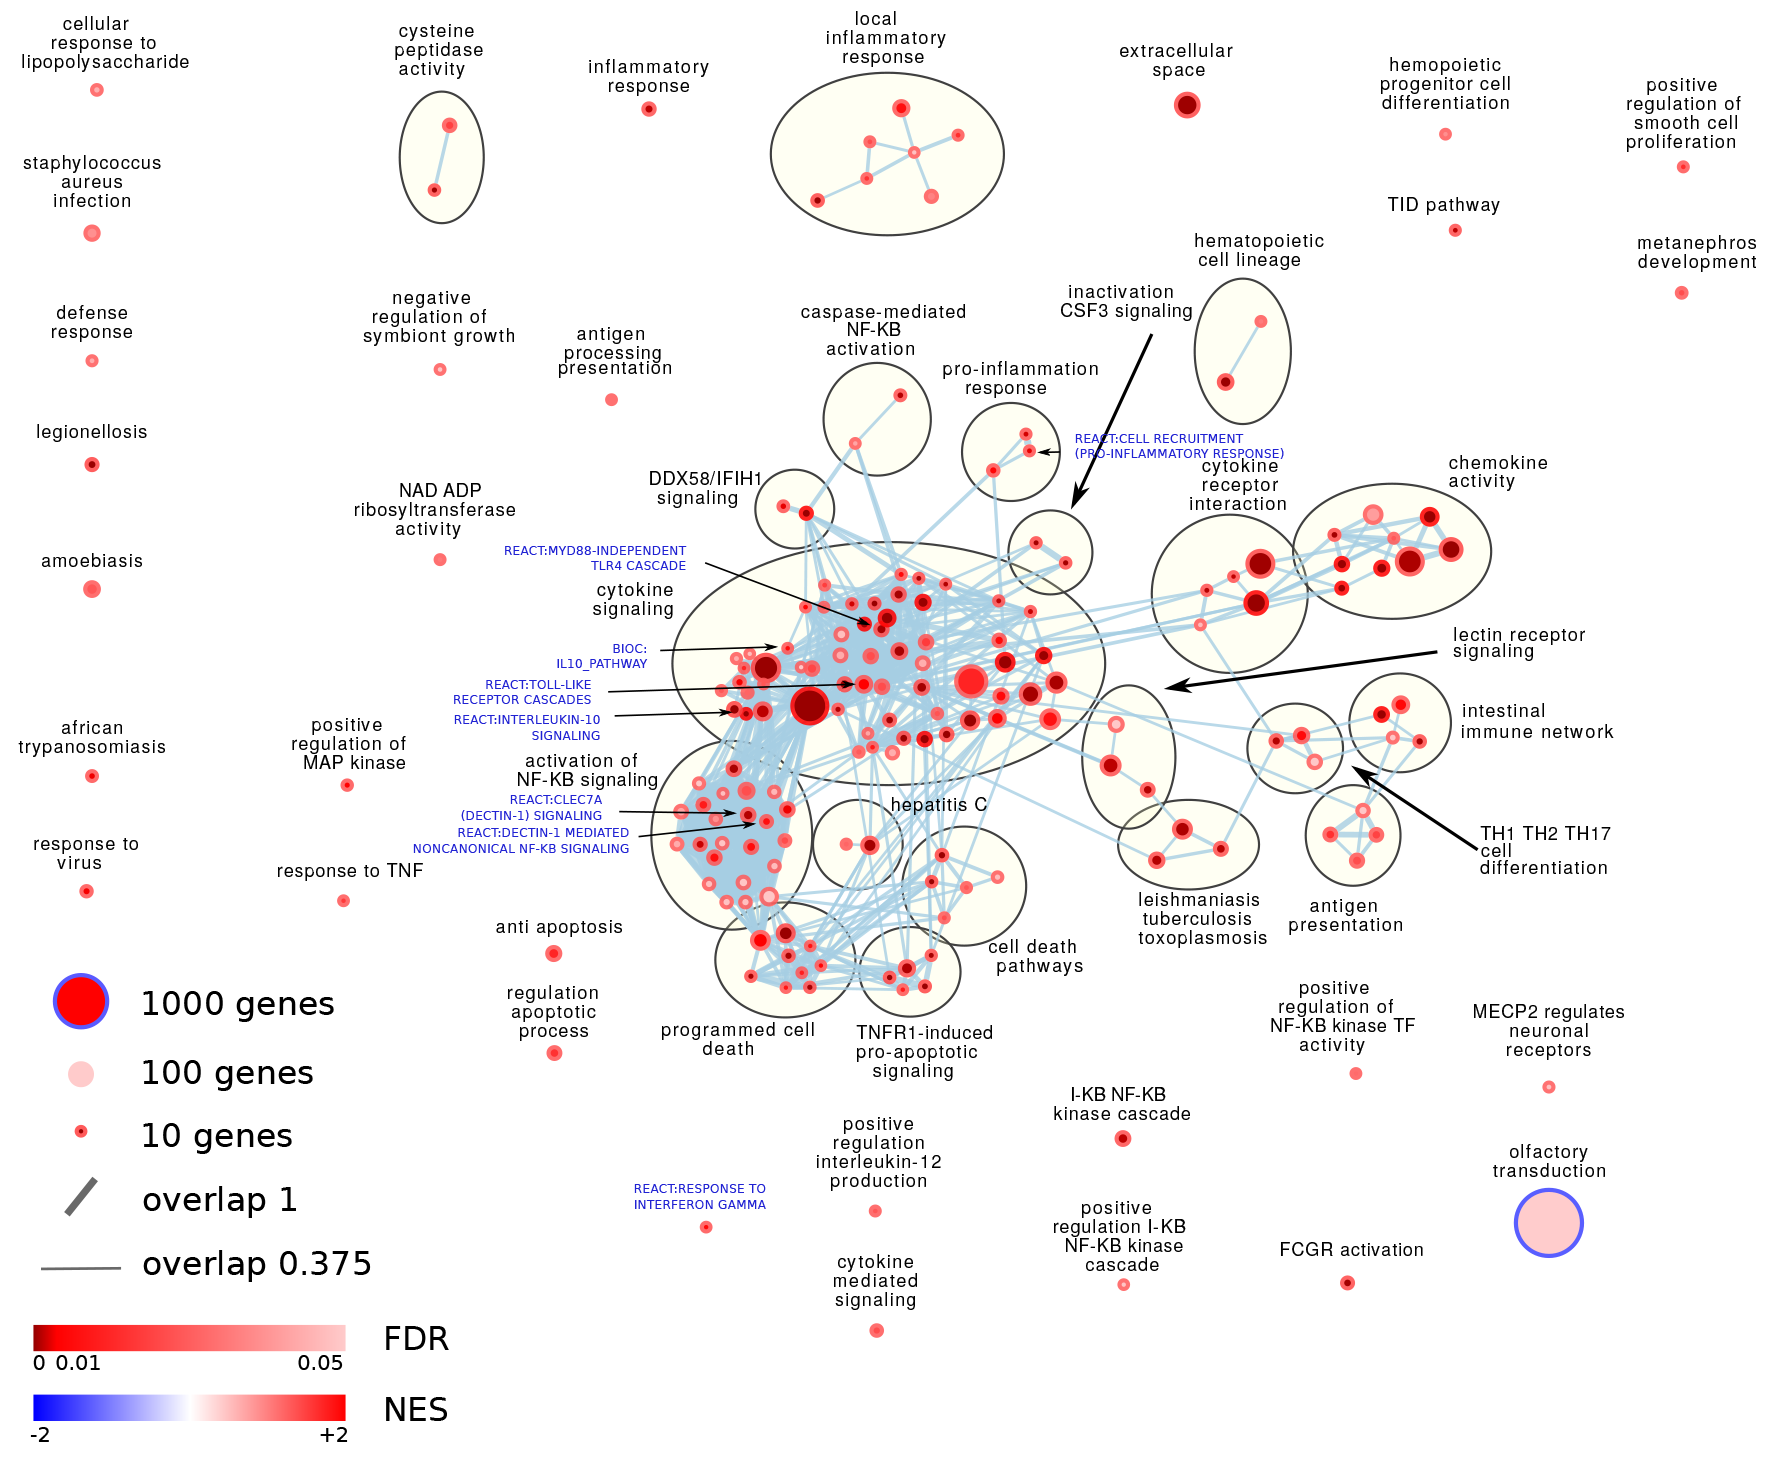


Figure A5. Among the genes upregulated by FLS exposure in AMs (Figure A5) were genes encoding cytokines and chemokines such as TNF, IL-1, IL-6 and CCL5. Similar patterns were previously observed with exposure of AMs to LPS alone, wherein upregulation of pathways including “toll-like receptor cascade” and “proinflammatory response” were reported (1). The NF-κB signaling pathway was identified as a major biological process in AMs exposed to FLS. This pathway is a key mediator of pro-inflammatory gene expression that is triggered by a variety of stimuli, including ligands of pattern-recognition and cytokine receptors (2). Dectin-1 mediated NF-κB signaling, which results from the binding of β-glucan on fungal spores, was also identified (3-5). The stimulus mixture contained LPS, which activates NF-κB via both MyD88-dependent and MyD88-independent TLR signaling. Thus, activation of NF-κB signaling is an expected response of AMs from healthy horses to these types of stimuli. As over-activation of NF-κB signaling is a hallmark of inflammatory disease (2), it might suggest that similar to humans with chronic inflammatory lung diseases (6, 7), AMs from asthmatic horses could have excessive NF-κB activation with FLS exposure. MyD88-dependent signaling induces the activation of the IL-10 pathway, which was observed in AMs with FLS exposure; however, IL-10 was not detected in the cell culture supernatant of AMs (8). Since the *IL-10* gene was upregulated, this suggests that in a potent proinflammatory environment, the production or secretion of this anti-inflammatory protein was interfered with by the inhibition of the phosphatidylinositol 3 kinase-Akt pathway (9). The IL-17 signaling pathway was also upregulated with FLS exposure in AMs. IL-17 is a proinflammatory cytokine that recruits and activates neutrophils (10). Activation of the IL-17 signaling pathway combined with the upregulation of CXCL8 supports a role for AMs in neutrophil mobilization in inflammatory lung diseases including sEA. Apoptosis-associated pathways were also activated in AMs exposed to FLS. Activation of AM apoptosis could result from LPS-induced production of TNF and autocrine exposure (11), as previously reported in horses (1). Overrepresentation of apoptotic signaling pathways in BALF leukocytes was reported in horses with sEA (12, 13), and apoptosis of AMs was also a feature of pulmonary inflammation in mice with pneumonia (14). However, in addition to LPS, our challenge material contained silica particles, which once phagocytosed, may induce apoptosis and cause cell death (15). The FLS-induced activation of apoptotic pathways of AMs may thus indicate a mechanism of inflammation generalizable to diverse lung diseases including silicosis, pneumonia, and asthma (12, 14, 15).

Figure A6.Gene-set enrichment analysis of the differentially expressed genes between control and FLS-stimulated monocyte-derived macrophages. Data presented as in Figure E4. Cytokine signaling in immune response is the most prominent biological theme upregulated by FLS exposure.


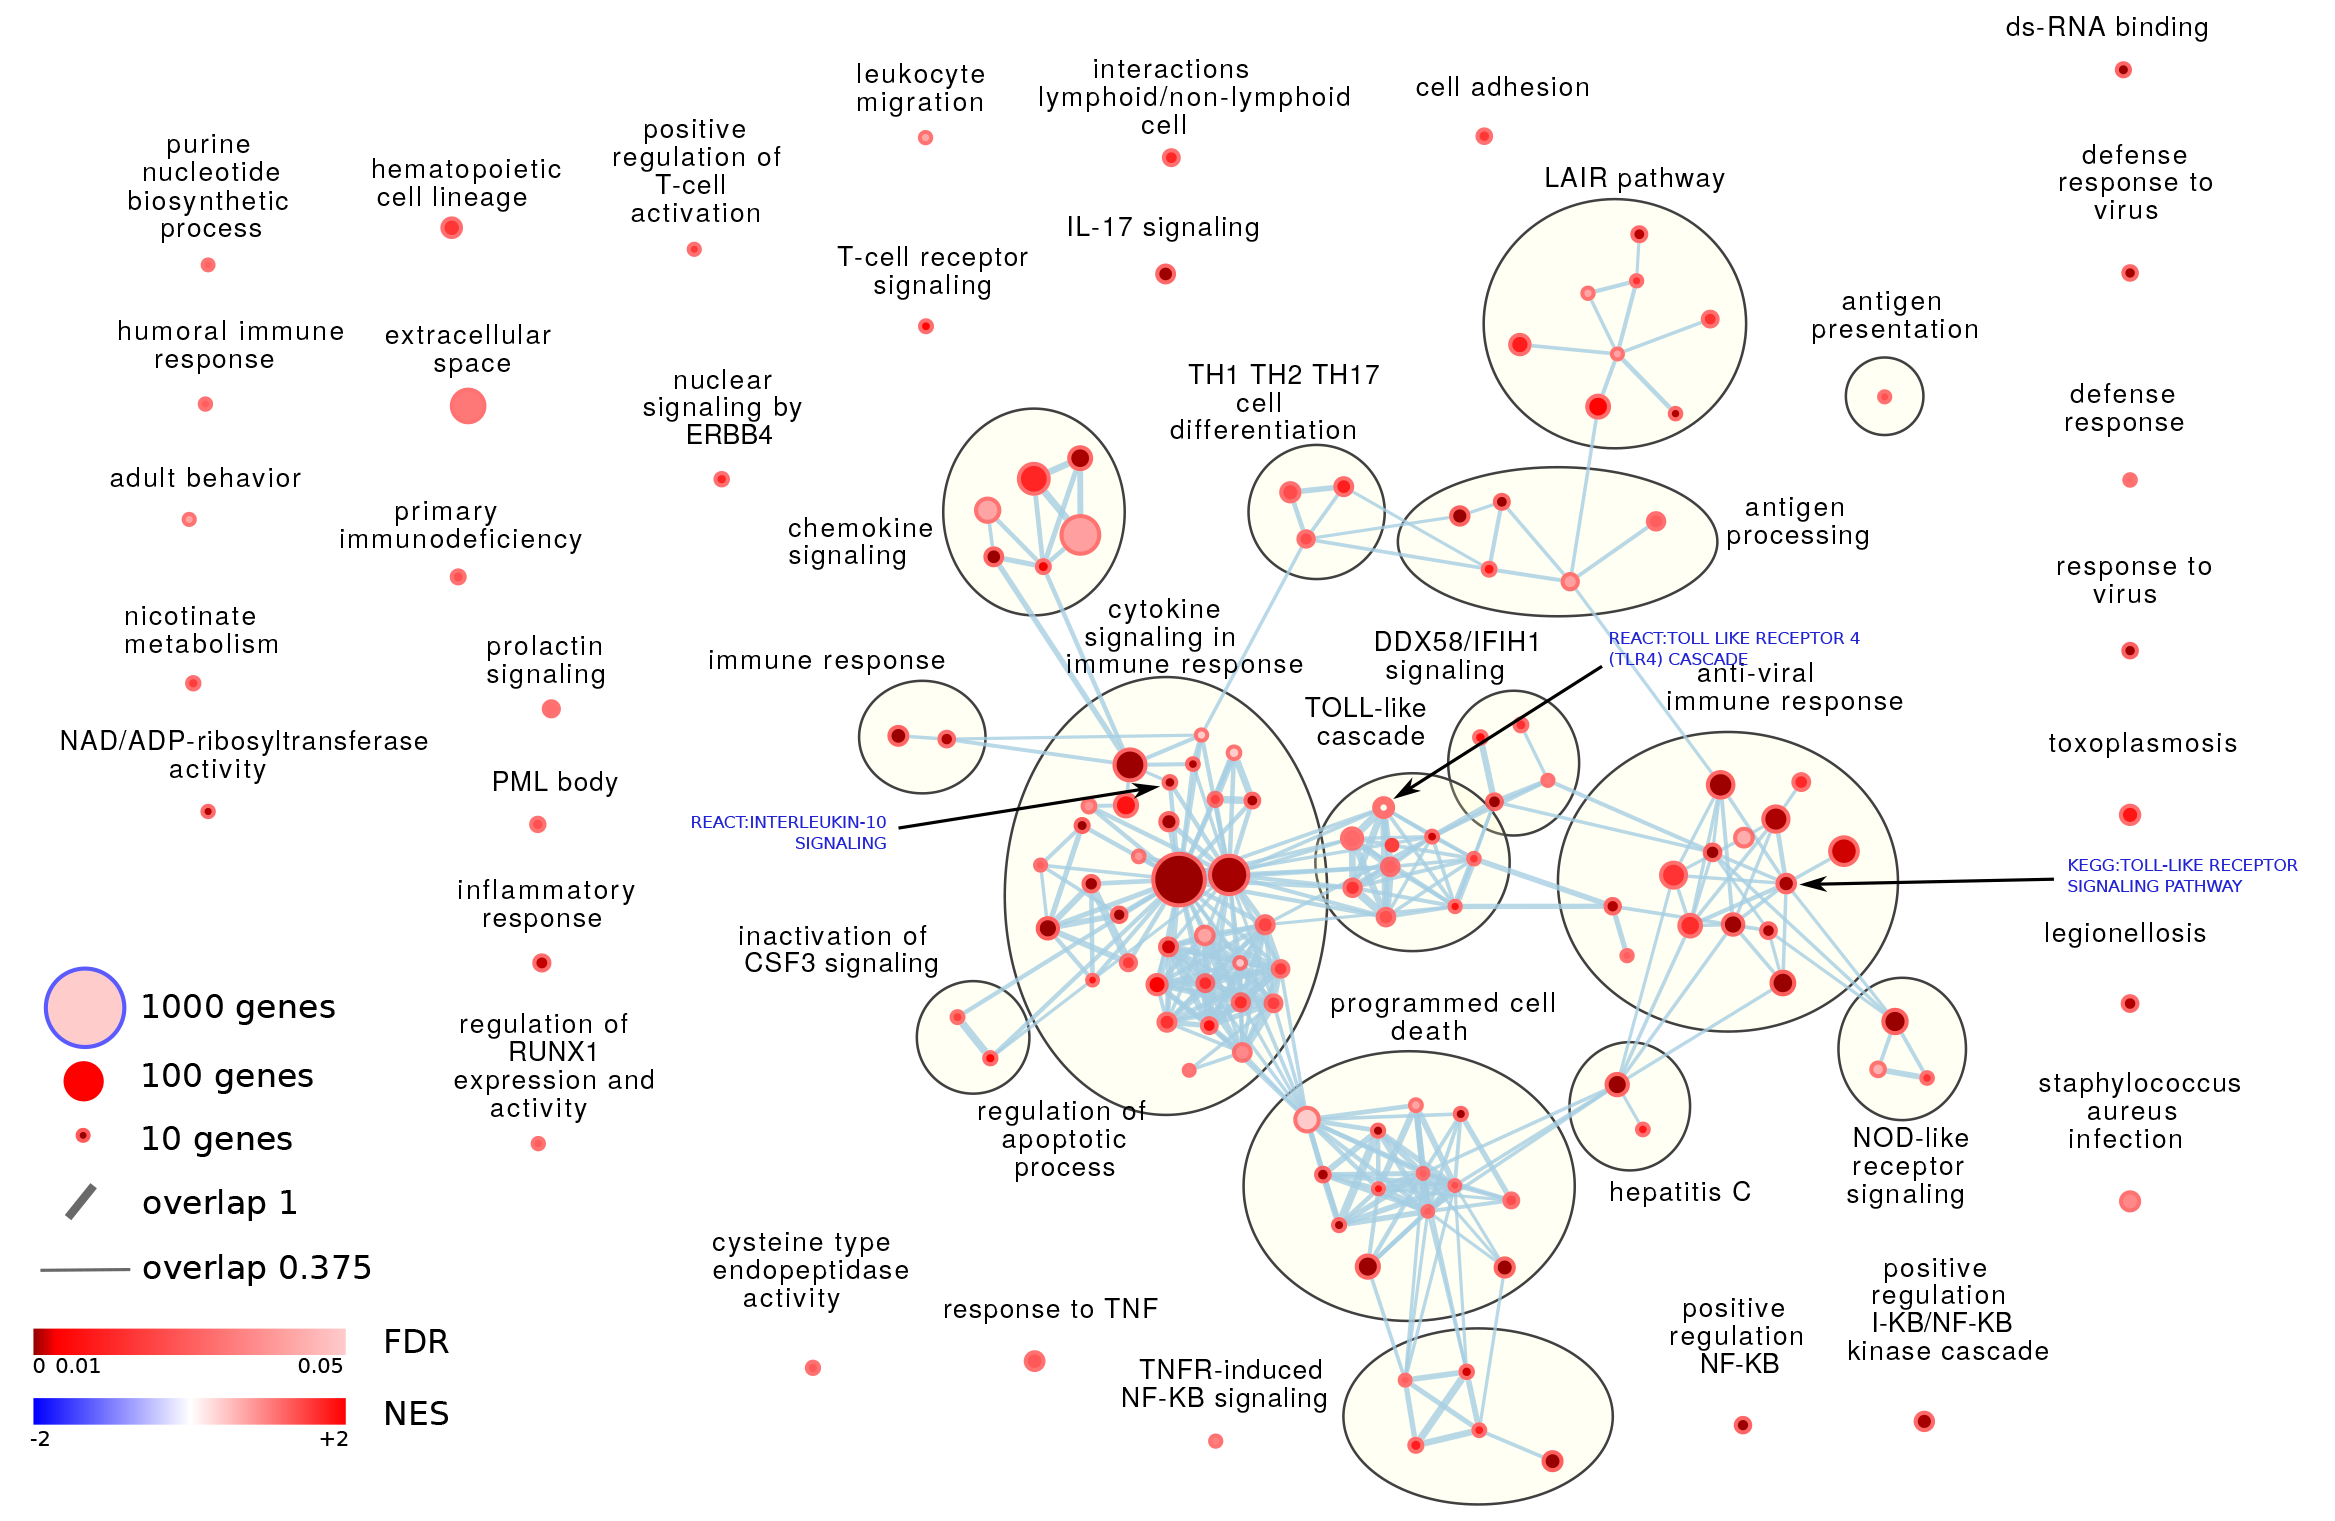


Figure A6. Similar to AMs, FLS-exposed MDMs had abundant upregulated genes, many of which were genes encoding inflammatory cytokines including TNF, IL-10 and CCL5. It was previously reported that LPS-exposed equine monocytes expressed genes encoding TNF, IL-10 and IL-1β but not CCL5 or IFNβ. Therefore, it was concluded that LPS exposure activated the MyD88-dependent pathway but not the MyD88-independent pathway (16). In contrast, here, over-expression of genes from both pathways were detected in MDMs: genes encoding TNF and IL-10 from the MyD88-dependent pathway, and genes encoding CCL5, IFNβ and CXCL10 from the MyD88-independent pathway. The fungal spores in the challenge material would likely cause β-glucan-mediated dectin-1 signaling, which could have contributed to the activation of MyD88-independent pathways and the production of IFNβ (4, 17).

The main biological theme activated by FLS exposure in MDMs was “cytokine signaling in immune response” (Figure 3). Additionally, we observed enrichment in the “toll-like cascade”, “anti-viral immune response” and “programmed cell death” pathways. The immunological pathways triggered by FLS were similar to the pathways activated in the early stages of viral infections (18, 19), even though the exposure material did not contain viral components. This finding supports an innate immune response driven by recognition of conserved molecules that induce broadly utilized pathways (20). Pathways regulating apoptosis were also activated in MDMs after FLS exposure (Figure E5). Such activation of apoptotic and chemotactic pathways in AMs and MDMs may facilitate replacement of resident AMs and infiltration of leukocytes, including blood monocytes, into the lung during inflammatory diseases (21).

Figure A7. Visualization of differentially expressed genes between control and FLS-stimulated alveolar macrophages. The volcano plot was generated from differential gene expression results obtained from DESeq2. Red dots indicate 1569 genes significantly upregulated, and blue dots indicate 1246 genes significantly downregulated.


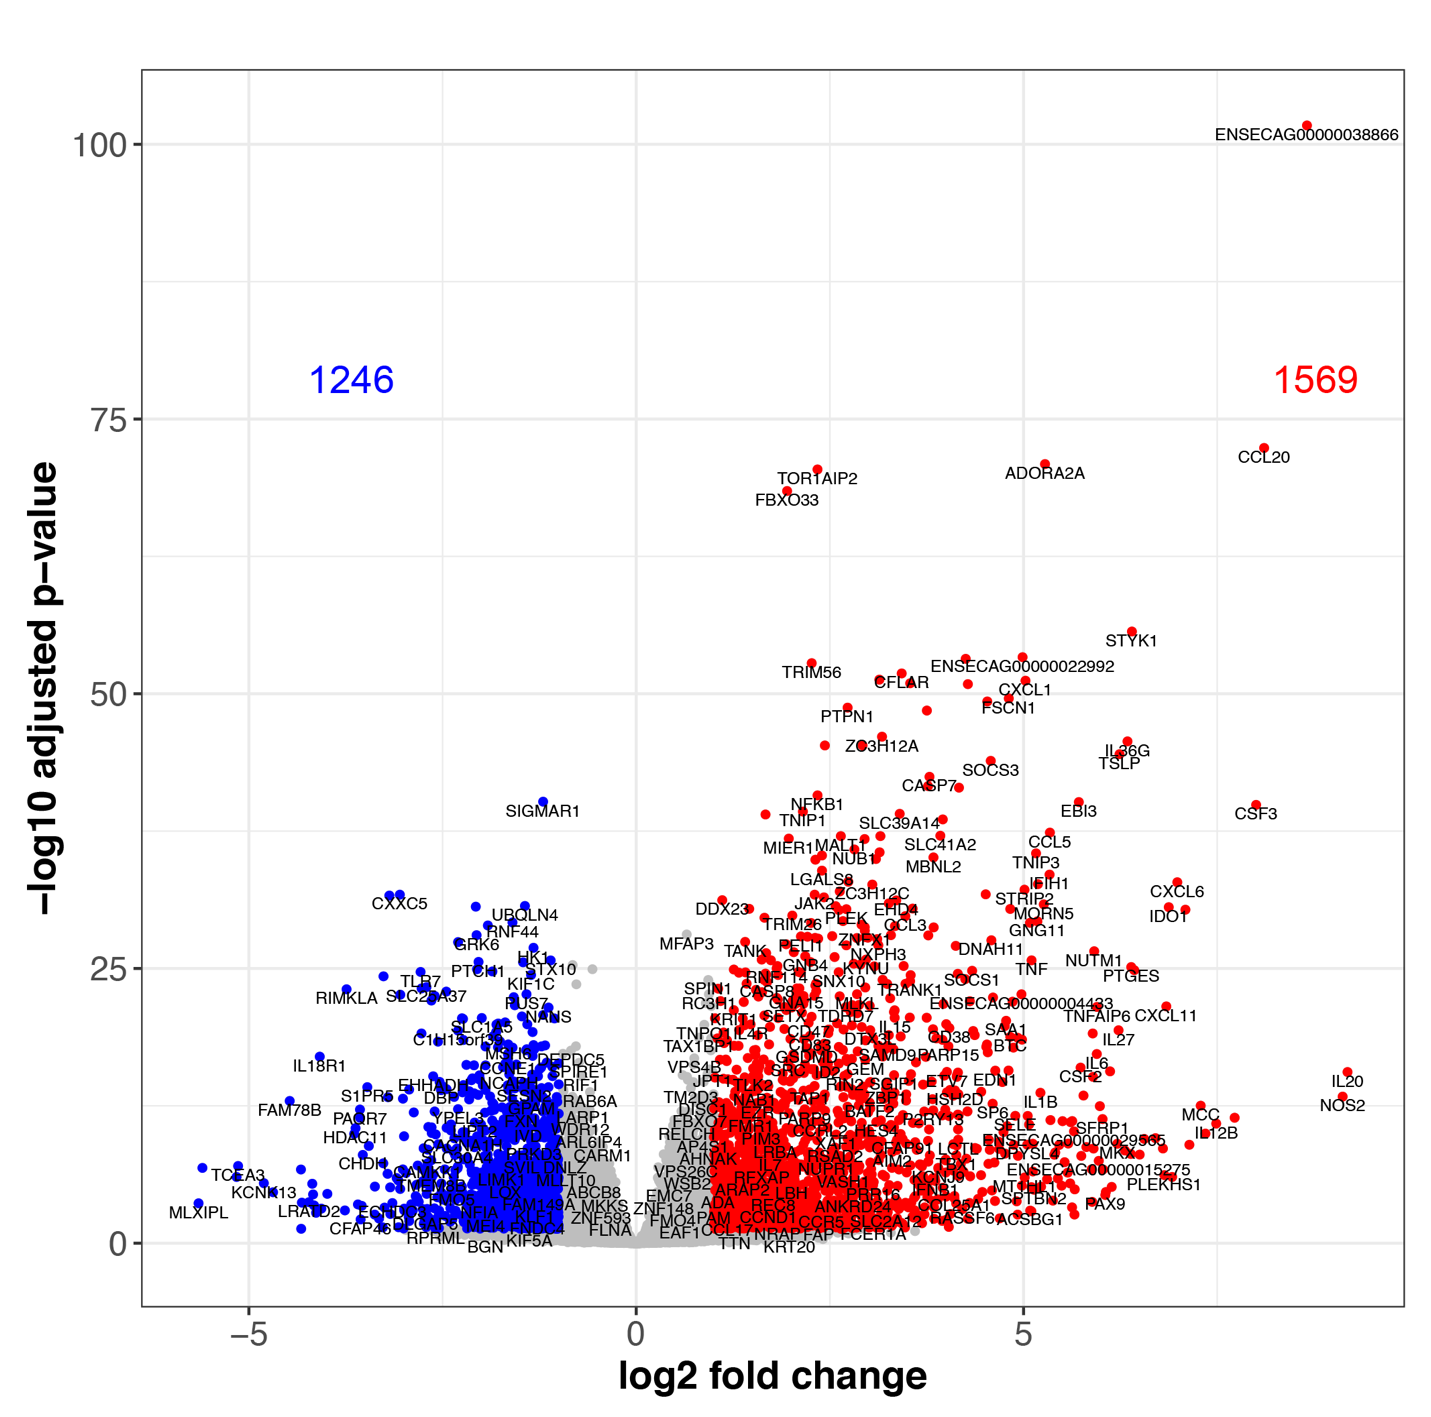


Figure A8. Visualization of differentially expressed genes between control and FLS- stimulated monocyte-derived macrophages. The volcano plot is generated as in Figure 2; 1624 genes were significantly upregulated, and 1164 genes were significantly downregulated.


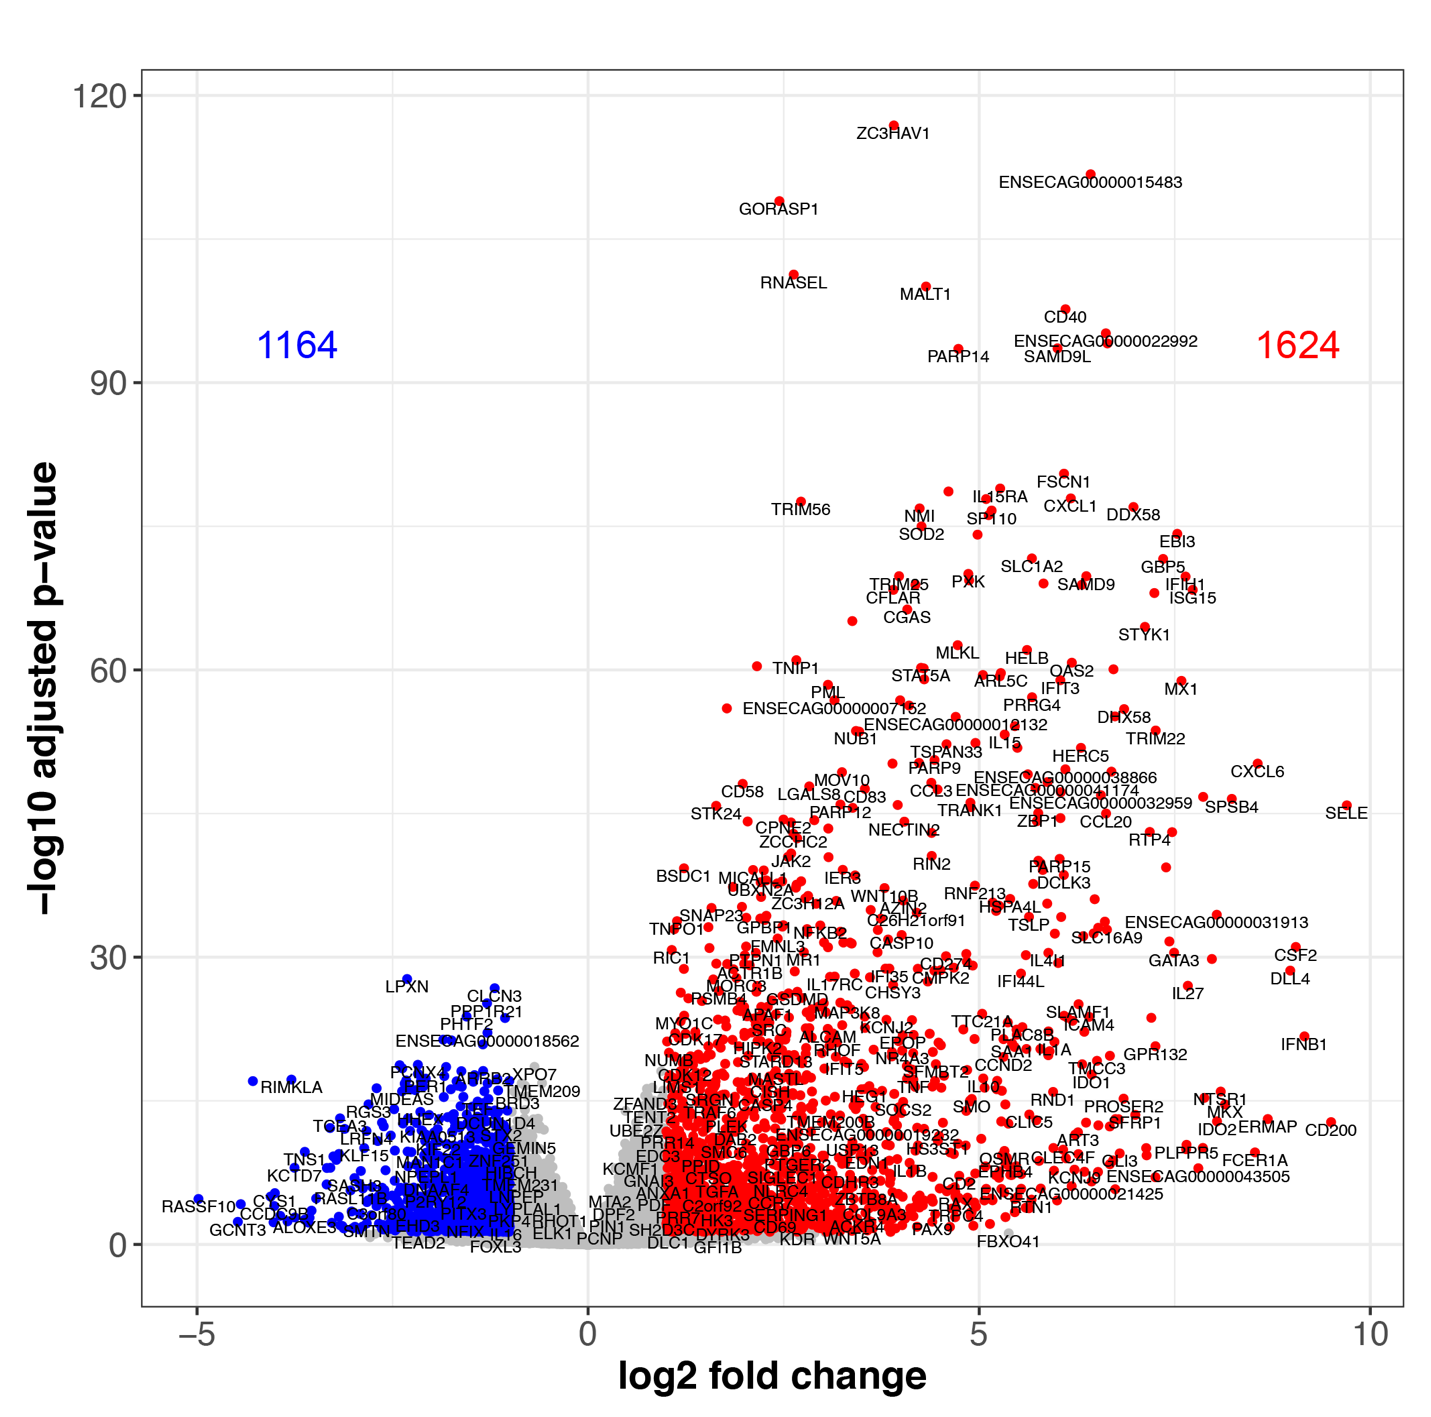


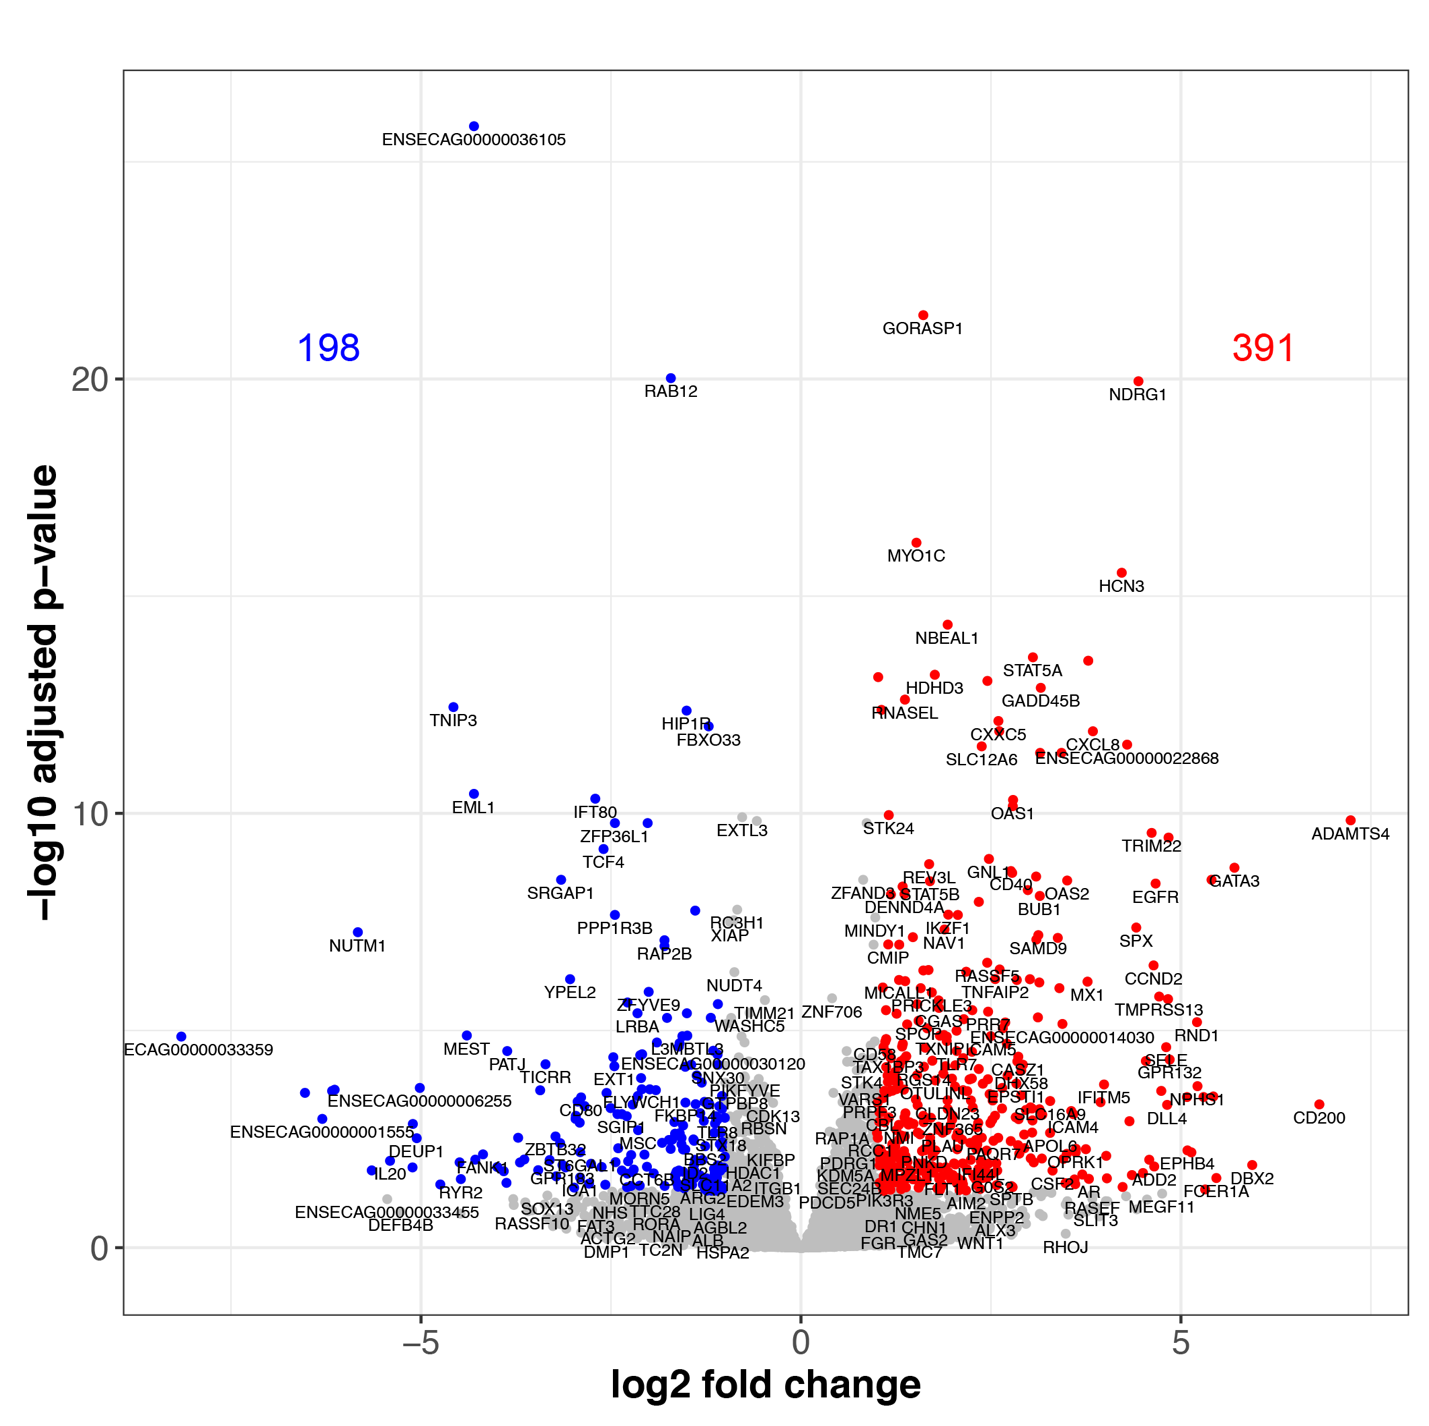
Figure A9. Visualization of differentially expressed genes between alveolar macrophages and monocyte-derived macrophages reflecting the effect of FLS on expression change. The volcano plot is presented as in Figure 2; 391 genes were significantly upregulated in MDMs and 198 genes were significantly upregulated in AMs.

**References**

1. Karagianni AE, Kapetanovic R, Summers KM, McGorum BC, Hume DA, Pirie RS. Comparative transcriptome analysis of equine alveolar macrophages. Equine Vet J. 2017;49(3):375-82.

2. Liu T, Zhang L, Joo D, Sun SC. NF-kappaB signaling in inflammation. Signal Transduct Target Ther. 2017;2:17023-.

3. Beeler-Marfisi J, Clarke ME, Wen X, Sears W, Huber L, Ackerley C, et al. Experimental induction of recurrent airway obstruction with inhaled fungal spores, lipopolysaccharide, and silica microspheres in horses. Am J Vet Res. 2010;71(6):682-9.

4. Hohl TM, Van Epps HL, Rivera A, Morgan LA, Chen PL, Feldmesser M, et al. Aspergillus fumigatus triggers inflammatory responses by stage-specific beta-glucan display. PLoS Pathog. 2005;1(3):e30.

5. Di Pietro R, Dubuc V, Manguin E, Giroux-Lafond R, Bedard C, Boivin R, et al. Characterization of fungal exposure and dectin-1 expression in healthy horses and horses with severe asthma. Am J Vet Res. 2022;83(6).

6. Edwards MR, Bartlett NW, Clarke D, Birrell M, Belvisi M, Johnston SL. Targeting the NF-kappaB pathway in asthma and chronic obstructive pulmonary disease. Pharmacol Ther. 2009;121(1):1-13.

7. Schuliga M. NF-kappaB Signaling in Chronic Inflammatory Airway Disease. Biomolecules. 2015;5(3):1266-83.

8. Kang H, Lee GKC, Bienzle D, Arroyo LG, Sears W, Lillie BN, et al. Equine alveolar macrophages and monocyte-derived macrophages respond differently to an inflammatory stimulus. PLoS One. 2023;18(3):e0282738.

9. Martin M, Schifferle RE, Cuesta N, Vogel SN, Katz J, Michalek SM. Role of the phosphatidylinositol 3 kinase-Akt pathway in the regulation of IL-10 and IL-12 by Porphyromonas gingivalis lipopolysaccharide. J Immunol. 2003;171(2):717-25.

10. Hynes GM, Hinks TSC. The role of interleukin-17 in asthma: a protective response? ERJ Open Res. 2020;6(2).

11. Xaus J, Comalada Mn, Valledor AF, Lloberas J, López-Soriano F, Argilés JM, et al. LPS induces apoptosis in macrophages mostly through the autocrine production of TNF-α. Blood. 2000;95(12):3823-31.

12. Tessier L, Cote O, Clark ME, Viel L, Diaz-Mendez A, Anders S, et al. Impaired response of the bronchial epithelium to inflammation characterizes severe equine asthma. BMC Genomics. 2017;18(1):708.

13. Niedzwiedz A, Jaworski Z, Tykalowski B, Smialek M. Neutrophil and macrophage apoptosis in bronchoalveolar lavage fluid from healthy horses and horses with recurrent airway obstruction (RAO). BMC Vet Res. 2014;10:29.

14. Marriott HM, Hellewell PG, Cross SS, Ince PG, Whyte MK, Dockrell DH. Decreased alveolar macrophage apoptosis is associated with increased pulmonary inflammation in a murine model of pneumococcal pneumonia. J Immunol. 2006;177(9):6480-8.

15. Gozal E, Ortiz LA, Zou X, Burow ME, Lasky JA, Friedman M. Silica-induced apoptosis in murine macrophage: involvement of tumor necrosis factor-alpha and nuclear factor-kappaB activation. Am J Respir Cell Mol Biol. 2002;27(1):91-8.

16. Figueiredo MD, Vandenplas ML, Hurley DJ, Moore JN. Differential induction of MyD88- and TRIF-dependent pathways in equine monocytes by Toll-like receptor agonists. Vet Immunol Immunopathol. 2009;127(1-2):125-34.

17. del Fresno C, Soulat D, Roth S, Blazek K, Udalova I, Sancho D, et al. Interferon-beta production via Dectin-1-Syk-IRF5 signaling in dendritic cells is crucial for immunity to C. albicans. Immunity. 2013;38(6):1176-86.

18. Chen L, Deng H, Cui H, Fang J, Zuo Z, Deng J, et al. Inflammatory responses and inflammation-associated diseases in organs. Oncotarget. 2017;14(9):7204-18.

19. Seth RB, Sun L, Chen ZJ. Antiviral innate immunity pathways. Cell Res. 2006;16(2):141-7.

20. Marshall JS, Warrington R, Watson W, Kim HL. An introduction to immunology and immunopathology. Allergy Asthma Clin Immunol. 2018;14(Suppl 2):49.

21. Maus UA, Janzen S, Wall G, Srivastava M, Blackwell TS, Christman JW, et al. Resident alveolar macrophages are replaced by recruited monocytes in response to endotoxin-induced lung inflammation. Am J Respir Cell Mol Biol. 2006;35(2):227-35.
